# 1 High-throughput genotype based population structure 2 analysis of selected buffalo breeds

3 **Prakash B. Thakor<sup>1</sup>, Ankit T. Hinsu<sup>1</sup>, Dhruv R. Bhatiya<sup>1</sup>, Tejas M.  
4 Shah<sup>2</sup>, Nilesh Nayee<sup>3</sup>, A Sudhakar<sup>3</sup>, Chaitanya G. Joshi<sup>2\*</sup>**

5 1. Department of Animal Genetics and Breeding, College of Veterinary Science &  
6 Animal Husbandry, Anand Agriculture University, Anand, India-388001

7 2. Department of Animal Biotechnology, College of Veterinary Science & Animal  
8 Husbandry, Anand Agriculture University, Anand, India-388001

9 3. National Dairy Development Board, Anand, India-388001

10  
11 \*Corresponding author

12 E-mail: cgjoshi@rediffmail.com

## 13 **Abstract**

14 The water buffalo (*Bubalus bubalis*) has shown enormous milk production  
15 potential in many Asian countries. India is considered as the home tract of some of the best  
16 buffalo breeds. However, genetic structure of the Indian river buffalo is poorly understood.  
17 Hence, for selection and breeding strategies, there is a need to characterize the populations  
18 and understand the genetic structure of various buffalo breeds. In this study, we have  
19 analysed genetic variability and population structure of seven buffalo breeds from their  
20 respective geographical regions using Axiom<sup>®</sup> Buffalo Genotyping Array having 124,030  
21 Single Nucleotide Polymorphisms (SNPs). Blood samples were obtained from 302  
22 buffaloes comprising Murrah, Nili-Ravi, Mehsana, Jaffarabadi, Banni, Pandharpuri and  
23 Surti breeds. Diversity, as measured by expected heterozygosity ( $H_e$ ) ranged from 0.364 in  
24 the Surti to 0.384 in the Murrah breed. All the breeds showed negligible inbreeding  
25 coefficient. Pair-wise  $F_{ST}$  values revealed the lowest genetic distance between Mehsana  
26 and Nili-Ravi (0.0022) while highest between Surti and Pandharpuri (0.030). Principal  
27 component analysis and structure analysis unveiled the differentiation of Surti,  
28 Pandharpuri and Jaffarabadi in first two PCs, while remaining breeds were grouped  
29 together as a separate single cluster. Murrah and Mehsana showed early linkage  
30 disequilibrium decay while Surti breed showed late decay, similarly LD based  $N_e$  was  
31 drastically declined for Murrah and Mehsana since last 100 generations. In LD blocks to  
32 QTLs concordance analysis, 14.19 per cent of concordance was observed with 873 (out of  
33 1144) LD blocks overlapped with 8912 (out of 67804) QTLs. Overall, total 4090 markers  
34 were identified from all LD blocks for six types of traits. Results of this study indicated  
35 that these SNP markers could differentiate phenotypically distinct breeds like Surti,

36 Pandharpuri and Jaffarabadi but not others. So, there is a need to develop SNP chip based  
37 on SNP markers identified by sequence information of local breeds.

### 38 **Author Summary**

39 Indian buffaloes, through 13 recognised breeds, contribute about 49% in  
40 total milk production and play a vital role in enhancing the economic condition of Indian  
41 farmers. High density genotyping these breeds will allow us to study differences at the  
42 molecular level. Evolutionary relationship and phenotypes relations with genotype could  
43 be tested with high density genotyping. Breed structure analysis helps to take effective  
44 breeding policy decision. In the present study, we have used the high-throughput  
45 microarray based genotyping technology for SNP markers. These markers were used for  
46 breed differentiation using various genetic parameters. Population structure reflected the  
47 proportion of breed admixture among studied breeds. We have also tried to dig the markers  
48 associated with traits based LD calculation. However, these SNPs couldn't explain obvious  
49 variation up to the expected level, hence, there is need to develop an indigenous SNP chip  
50 based on Indian buffalo populations.

## 51 **Introduction**

52 The importance of genetic diversity in livestock is directly related to the need for  
53 genetic improvement of economically important traits as well as to facilitate rapid  
54 adaptation to potential changes as per breeding goals [1]. Population structure, and unusual  
55 levels of shared ancestry, can potentially cause spurious associations. The analysis of a  
56 large number of SNPs across the genome will reveal aspects of the population genetic  
57 structure, including evidence of adaptive selection across the genome [2]. Domestication  
58 greatly changed the morphological, behavioural characteristics, and selection programmes  
59 for improving the production traits allowed the formation of very diverse breeds [3].

60 India, the largest producer of milk in the world, is producing over 155.5 million  
61 tone milk during 2015-16 and about 49% of milk production is contributed by buffaloes  
62 [4]. India has approximately 108.7 million buffaloes [4] with 13 registered breeds  
63 recognized based on their phenotypic characteristics, production performance, utility  
64 pattern and eco-geographical distribution.

65 Genetic analysis is facilitated by genotyping polymorphic genetic loci, also called  
66 genetic variants, signposts, landmarks or markers. SNPs are the most common type of  
67 genetic variants, consisting of a single nucleotide differences between two individuals at a  
68 particular site in the DNA sequence. SNPs are generally bi-allelic. Assessing genetic  
69 biodiversity and population structure of minor breeds through the information provided by  
70 neutral molecular markers like, SNPs & microsatellites, allows determination of their  
71 extinction risk and to design strategies for their management and conservation [5].  
72 Maintenance of genetic variation is a condition for continuous genetic improvement. For  
73 overall breed improvement and to meet future challenges there is an immediate action to  
74 be taken for characterization of buffalo breeds in India. Comprehensive knowledge of  
75 genetic variation within and among different breeds is very much necessary for  
76 understanding and improving traits of economic importance. Current study was performed  
77 based on SNP genotyping data to determine the genetic structure of Indian buffalo breeds  
78 so that to construct appropriate conservation strategies and to utilize the breed variation.

## 79 **Materials and Methods**

### 80 **Animals and Sampling**

81 A total of 302 female buffaloes were used in this study, comprising of seven  
82 breeds: Murrah ( $n=70$ ), Nili-Ravi ( $n = 40$ ), Mehsana ( $n = 75$ ), Jaffarabadi ( $n = 41$ ), Banni  
83 ( $n = 20$ ), Pandharpuri ( $n = 34$ ) and Surti ( $n = 22$ ). All animals were selected based on their  
84 true breed specific phenotypic characteristics from their respective home tract and blood  
85 samples were collected from all the selected animals.

### 86 **SNP Genotyping**

87 DNA was extracted using QIAamp® kit as per manufacturer's instructions at R&D  
88 laboratory NDDDB, Hyderabad. DNA quantity and quality were checked using Nanodrop™  
89 (Thermo Fisher Scientific, MA) and agarose gel electrophoresis respectively. SNP

90 genotyping was carried out using Axiom<sup>®</sup> Buffalo Genotyping Array with 123,040 SNPs  
91 on GeneTitan<sup>®</sup> MC (Thermo Fisher Scientific, MA) instrument at a commercial laboratory  
92 (Imperial Life Science Group, Gurgaon). Array was pre-designed through the Expert  
93 Design Program, facilitated by Affymetrix and developed in collaboration with the  
94 International Buffalo Genome Consortium using reference genome of *Bos taurus*  
95 (UMD3.1) for SNP position and annotation (Thermo Fisher Scientific, MA; Iamartino *et*  
96 *al.*, 2013). It was designed based on SNPs discovered from Mediterranean, Murrah,  
97 Jaffarabadi and Nili-Ravi breeds of buffaloes. The genotyping experiment was performed  
98 in four batches, NDDDB\_EXP 1 (96 samples), NDDDB\_EXP 2 (96 samples), NDDDB\_EXP 3  
99 (95 samples) and NDDDB\_EXP 4 (89 samples) with average call rate ranged from 97 per  
100 cent to 98.8 per cent.

### 101 **Data filtering and quality control**

102 Only SNPs mapped to autosomal chromosomes were used in this study. Data was  
103 filtered based on criteria: SNPs that have poor call rate (<95%). Further, quality control  
104 was performed with PLINK v1.07 [6] and SNPs removed with following criteria: missing  
105 genotypes (geno < 0.1), individual missing genotypes (mind < 0.1), minor allele frequency  
106 (MAF < 0.05) and Hardy-Weinberg Equilibrium (HWE < 0.00001). Remaining markers  
107 were used for further analysis.

### 108 **Genetic Diversity Assessment**

109 Observed and expected genotype frequencies within each breed was calculated for  
110 all the loci using PLINK v1.07 [7] and the results were evaluated based on p values  
111 obtained for each loci. Linkage disequilibrium was calculated using PLINK and R<sup>2</sup> values  
112 were calculated for all SNP pairs which were located not more than 1000 SNPs apart and  
113 falling under 10 Mb distance windows. Further SNPs were binned with bin size of 10,000  
114 bases distance and average R<sup>2</sup> value of each bin was plotted against median distance value  
115 ggplot2 v2.2.1 [8] package in R v3.3. Pair-wise F<sub>ST</sub> values between all possible  
116 combination of breeds were estimated and subsequently dendrogram was generated in  
117 Fitch-Phylip [9] using Fitch-Margoliash method.

118 Breed-wise effective population size (Ne) was calculated using SNeP v1.1 [10]  
119 with parameters: bin-width=50,000 bp; minimum distance between SNPs=50,000 bp,  
120 maximum distance between SNPs=4,000,000 bp, minimum allele frequency=0.05.  
121 Principle component analysis was calculated using PLINK-1.9 [11] with 285 highly  
122 variable markers (Allele frequency difference between breeds > 0.5). PCA was plotted  
123 using scatterplot3d [12] package in R. Breed structure and breed differentiation was  
124 performed using fastSTRUCTURE [13] using same 285 highly variable markers. The  
125 differentiation of populations was performed up to the group (K) level of 8 using simple  
126 model. The fastSTRUCTURE analysis provided ancestry proportions for each sample  
127 under analysis which was graphically represented by distruct.py script within the  
128 fastSTRUCTURE software.

## 129 **Genome wide LD block mapping on QTLs**

130 Linkage disequilibrium (LD) blocks, combination of alleles linked along a  
131 chromosome and inherited together from a common ancestor, were generated with Java  
132 based gPLINK v1.0 and Haploview v2.01 [14]. Blocks were defined by employing  
133 haplotypic diversity criterion, where a small number of common haplotypes provide high  
134 chromosomal frequency coverage [15-18]. The algorithm suggested by Gabriel et al. [19]  
135 was used which defines a pair of SNPs to be in strong LD if the upper 95% confidence  
136 bound of  $D'$  value between 0.7 and 0.98. Reconstructed haplotypes were inserted into  
137 Haploview v2.01 [14] to estimate LD statistics and construct the blocking pattern for all 29  
138 autosomes. LD blocks were estimated using an accelerated EM algorithm method  
139 described by Qin et al. [20]. QTL database was retrieved from previously reported QTLs  
140 in Animal QTLdb [21]. QTL data set of cattle (*Bos taurus*) QTL\_UMD\_3.11.bed was used  
141 as a reference for the analysis, containing the information regarding six types of the traits:  
142 milk traits; health traits; production traits; reproduction traits; exterior traits; and meat and  
143 carcass traits. The QTL files were intersected with the files of LD-blocks using Bedtools  
144 v2.26.0 [22] to obtain information of QTLs overlapping with LD blocks.

## 145 **Results**

### 146 **Genetic Diversity Analysis**

147 After data filtering and quality filtering, 295 samples with 75,704 SNPs remained  
148 available for population analysis. SNPs were discarded (total 47,336 SNPs) based on  
149 criteria: poor quality call rate (42,166), unknown chromosome-specific position (17),  
150 Chromosome X (4228), HWE less than 0.00001 (528), missing genotype rate less than 0.1  
151 (471), and all genotypes from seven Nili-Ravi animals were removed since they were  
152 outliers.

153 Alternate allele frequency followed almost intermediate distribution with higher  
154 proportion for Murrah and Mehsana (Fig 1.A). Highest allele count was observed in the  
155 range of frequency class 0.2-0.5. Highest average alternate allele frequency was observed  
156 in Nili-Ravi (0.3051) followed by Murrah (0.3049) while Jaffarabadi showed least average  
157 (0.3028) among all breeds (Fig 1.B). Highest proportion of alternate alleles was observed  
158 in Murrah with 91.86 per cent while lowest proportion was observed in Surti with 89.86  
159 per cent (Fig 1.C). The observed heterozygosity ( $H_o$ ) and expected heterozygosity ( $H_e$ )  
160 was also found highest in Murrah breed (0.3864 and 0.3846) followed by Mehsana breed  
161 (0.3857 and 0.3830), while lowest was observed in Pandharpuri breed with  $H_o = 0.3719$   
162 and  $H_e = 0.3680$  (**Error! Reference source not found.** 1). The lowest  $F_{IS}$  were observed  
163 for Murrah (-0.0046) and Mehsana (-0.0070) while highest was seen in Surti (-0.0314)  
164 followed by Banni (-0.0270).

165  $F_{ST}$  values showed lowest genetic distance between Murrah and Nili-Ravi  
166 (0.00221) followed by Murrah and Mehsana (0.00402) while highest genetic distance was  
167 observed between Surti and Pandharpuri (0.03097) followed by Surti and Banni (0.02650)  
168 (Table 2). Based on  $F_{ST}$  values, phylogenetic tree placed Nili-Ravi and Murrah as well as

169 Mehsana and Banni together in two separate clusters, which corresponds with their  
170 geographical origin (Fig 2). This differentiation also correlates with the phenotypic  
171 differentiation of the buffalo breeds.

### 172 **Population Structure**

173 The total variability of principal components explained was 65.6 per cent of which  
174 by first, second and third components explained 30.05 per cent, 27.14 per cent and 8.45  
175 per cent, respectively. This variation resulted in separate cluster of Surti, Pandharpuri and  
176 Jaffarabadi on coordinates 1, 2 and 3 respectively while other breeds remain admixed (Fig  
177 3).

178 Further, relatedness between breeds and the significance of the existence of  
179 subpopulations was investigated by model-based unsupervised clustering using K=2 to K=8  
180 (K values indicates the number of groups). Banni breed showed better separation with  
181 small amount of admixture at all levels while Murrah and Mehsana breed showed higher  
182 amount of admixture consistent with its crossing with other breeds. With increasing K  
183 values, Pandharpuri and Surti showed separation at all subsequent levels (Fig 4). At K=7,  
184 four buffalo breeds (Surti, Pandharpuri, Jaffarabadi and Banni) were distinctly separated.  
185 Three Jaffarabadi breed were identified as pure breed based on Q-value greater than 95 per  
186 cent while remaining showed variable amount of admixture. Similarly, Pandharpuri  
187 buffaloes showed highest number (26) of purebred individuals. Likewise, Surti breed  
188 showed negligible admixture with other breeds.

### 189 **Linkage Disequilibrium Analysis**

190 LD decay was performed using bin size of 10 kb distance between SNPs. LD decay  
191 showed highest  $R^2$  value in Surti (from 0.412 to 0.175) followed by Banni (from 0.412 to  
192 0.169). While Pandharpuri (from 0.379 to 0.149) and Nili-Ravi (from 0.412 to 0.139) as  
193 well as Mehsana (from 0.378 to 0.128) and Murrah (0.382 to 0.120) decayed almost with  
194 same rate. In Surti breed, LD decayed late as distance between loci increased compared to  
195 other. Nili-Ravi and Pandharpuri decayed almost together with given distance. Similar  
196 trend was shown by Mehsana and Murrah. Moreover, Mehsana and Murrah showed early  
197 decay among all the breeds (Fig 5. A).

198 A continuous steady decline in effective population size was observed over last  
199 1000 generations in all breeds. Effective population size of Murrah and Mehsana has  
200 drastically declined over last 100 generations with an increasingly steeper slope while  
201 Surti and Banni are declining almost at constant rate (Fig 5.B). Jaffarabadi, Nili-Ravi and  
202 Pandharpuri showed intermediate rate of declination over last 100 generations.

## 203 **Genome-Wide Study of LD blocks**

204 **LD blocks.** Total 1144 LD blocks were obtained with highest number of blocks on  
205 chromosome 1 (99 blocks) while lowest number of blocks on chromosome 28 (19 blocks)  
206 (Error! Reference source not found.). Overall, mean number of SNPs in block ranged  
207 from 2.75 to 4.54 SNPs per chromosome while, maximum number of SNPs per block  
208 ranged from 5 (chromosome 18) to 16 (chromosome 17). Overall, frequency-based size  
209 distribution of LD blocks revealed that highest number (547) of LD blocks were found  
210 having size less than 50 kb while very few (8) were observed having size as high as 400-  
211 450 kb (Fig 6).

212 **LD blocks – QTL concordance.** Out of 1144 LD block (4090 markers), 436 LD  
213 blocks (1624 markers), 368 LD blocks (1285 markers), 326 LD blocks (1253 markers),  
214 345 LD blocks (1351 markers), 81 LD blocks (338 markers) and 104 LD blocks (426  
215 markers) overlapped with QTLs for milk production trait; meat and carcass trait;  
216 reproduction trait; production trait; exterior trait; and health trait respectively (Fig 7).  
217 Concordance, measured as proportion of LD blocks and QTLs overlapping each other, was  
218 highest in chromosome one (16.91 %) while lowest on chromosome 14 (0.91 %). Overall  
219 concordance of all the chromosomes together was 14.19%, with 873 LD blocks  
220 intersecting with 8947 QTLs (Table 4). Chromosome-wise distribution of LD-blocks,  
221 number of markers and mapped QTLs for respective traits is shown in S1 Table.

222 Further, dendrogram was plotted based on markers overlapping with milk fat  
223 percentage (143 markers) and body weight (315 markers) QTLs (Fig 8). Surprisingly, no  
224 pattern was observed linking phenotypic recorded data with marker-based separation.

## 225 **Discussion**

226 Genetic diversity studies conducted for buffalo in India have previously relied  
227 primarily on the use of microsatellites markers [23-28] while use of SNP genotype data in  
228 Indian cattle has been previously reported by Dash et al. [29].

229 The chip used in this study was designed based on SNP markers of 4 breeds  
230 (Mediterranean, Murrah, Nili-Ravi and Jaffarabadi) although using the reference of *Bos*  
231 *taurus* (UMD\_3.1 assembly) [30]. The differences in allele frequencies among the breeds  
232 may be caused by genetic drift, adaptation to selection or ancient divergence among  
233 founder populations [31,32]. Therefore, it is possible that the SNPs that have been  
234 identified as being useful in one population may not necessarily be as useful in other  
235 breeds. Here, we used the term ‘Alternate allele’, because minor allele frequency does not  
236 exceed over 0.5 while in this study, the allele frequency exceeds over 0.5 often called as  
237 ‘Fixed allele’ and hence, it has been considered as an “Alternate allele”. The differences in  
238 observed allele frequencies among breeds show the genetic diversity that exists within and  
239 between the breeds [33]. The overall allele frequency observed in this study was higher  
240 than previously reported studies in indicine breeds [34-36].

241 Murrah and Mehsana had the highest numbers SNPs with intermediate class of  
242 frequency suggesting that this array could be utilised for these breeds for association  
243 studies, with available phenotypic data for the traits of interest. The higher genetic  
244 variability observed in the Murrah and Mehsana, which is evident from the population  
245 structure analysis that suggests introgression of these breeds with other breeds such as  
246 Banni, Nili-Ravi, Jaffarabadi, etc. While Surti and Pandharpuri showed less polymorphic  
247 SNPs suggesting less genetic variability. These findings further supported by observed  
248 heterozygosity ( $H_o$ ) and expected heterozygosity ( $H_e$ ) values, which was found higher in  
249 Murrah and Mehsana breeds as compared to other breeds which could be due to extensive  
250 use of these two breeds via artificial insemination technique. The purpose of using these  
251 breeds is to obtain appropriate production since they are the good milk producers.  
252 Pandharpuri and Surti have less genetic variability with the lowest  $H_e$  suggesting that  
253 inbreeding in conjunction with a small population size and resulted in a loss of variation  
254 within the breed. This low diversity was previously reported in other studies of cattle and  
255 buffalo using microsatellites [37-39] and using SNP panels [29,40]. The  $F$  statistics is an  
256 estimate of variation due to differences among populations, which is the reduction in  
257 heterozygosity of a sub-population due to genetic drift. All breeds have shown negligible  
258 inbreeding as negative values of  $F_{IS}$  in all breeds indicate that there is absence of  
259 inbreeding in these breeds. In this study, the mean  $F_{ST}$  indicated that a pair of Surti and  
260 Pandharpuri population has greater genetic distance than other pairs, similar to results of  
261 European cattle breeds (Brown Swiss and Holstein Friesian) [40]. Phylogenetic tree based  
262 on  $F_{ST}$  values revealed that grouping was observed according to geographical distribution  
263 of population as shown in microsatellite based study of cattle performed by Shah et al.  
264 [41]. They displayed results of phylogenetic relationships as three main clusters according  
265 to geographical distribution: Dangi and Khillar (cluster I); Gir, Kankrej, Nimari and Malvi  
266 (cluster II); and Gaolao and Kenkatha (cluster III). However, the results failed to explain  
267 the hypothesis that Mehsana breed has been developed using Murrah bulls on local Surti  
268 buffaloes [28] as both the breeds were clustered separately. In case of genetic diversity  
269 ( $F_{ST}$ ) of buffalo based on microsatellite markers [42], similar cluster pattern was observed  
270 as in current study. Surti and Pandharpuri grouped in single cluster in present study as  
271 shown by Kumar *et al.* (2007) as; cluster of Mehsana with Jaffarabadi, Surti with  
272 Pandharpuri and Murrah with Nagpuri. However, Jaffarabadi and Mehsana grouped in  
273 different clusters in present study whereas they were grouped in single cluster in the study  
274 updated Kumar *et al.* (2007).

275 The results of the PCA analysis revealed the higher amount of genetic similarities  
276 among Murrah, Mehsana, Banni and Nili-Ravi, while Surti, Jaffarabadi and Pandharpuri  
277 showed greater genetic differentiations with three distinct clusters. The clustering of  
278 populations from both the PCA and fastSTRUCTURE indicated low levels of within  
279 population diversity of the Surti, Jaffarabadi and Pandharpuri breeds and higher  
280 divergences of these populations from the Murrah, Mehsana, Banni and Nili-Ravi breeds.  
281 In current study, Surti, Jaffarabadi and Pandharpuri grouped in separate clusters, however,  
282 it was shown in single cluster by Kumar et al. [25]. The high genetic diversity and distinct  
283 breed structure imply the possibility of selective breeding in these Indian buffalo breeds



284 for genetic improvement (Murrah and Mehsana). Four breeds (Surti, Pandharpuri,  
285 Jaffarabadi and Banni) were able to get distinctly separate while two breeds (Murrah and  
286 Mehsana) showed greater admixture. These two breeds have been most popular amongst  
287 the buffalo breeds in terms of high milk yield. Murrah semen has been extensively and  
288 indiscriminately used for artificial insemination (AI) across the country while Banni,  
289 Jaffarabadi and Pandharpuri are less in number and been less utilized for insemination  
290 throughout the country, which has led to a steady decline in the genetic diversity present in  
291 the non-descript or less characterized populations. Kumar et al. [25] evaluated the breed  
292 admixture using microsatellite markers and results revealed that the 3 different clusters  
293 contributed mainly from the Toda, Jaffarabadi and Pandharpuri animals, with a very high  
294 membership coefficient. In case of cattle using microsatellite markers [41], the  
295 differentiation of Dangi, Khillar and Kenkatha cattle breeds was performed while Kankrej  
296 showed greater admixture with other breeds.

297         The probable cause of drastic decline is too large distribution of population from  
298 which only small proportion of population of superior germplasm being used for breeding  
299 purpose through AI. Moreover, in past, before 100-150 generations, farmers had adapted  
300 the intensive selective breeding based on some characters and use of elite animals from  
301 certain areas in absence of AI. Murrah has higher average allele frequencies while  
302 Pandharpuri and Surti breeds has lower values can be interpreted as higher allele frequency  
303 can be ascertained biasness to SNP selection from Murrah reference.

304         LD decay used to study the linkage of markers with increase in intermarker  
305 distance and was to decide appropriate intermarker distance for different populations. The  
306 magnitude of LD and its decay with genetic distance determine the resolution of  
307 association mapping and are useful for assessing the desired numbers of SNPs on arrays.  
308 The results of LD decay illustrate Surti breed showing early decay as compared to other  
309 breeds while Mehsana and Murrah breeds showed late decay together which could be  
310 assumed as they are under strong selection pressure. Similar results were obtained by Dash  
311 et al. [29] for Indian cattle breeds where Sahiwal and Tharparkar breeds showed late  
312 decay. These results reflected that the Surti breed has smaller population size as it got  
313 decayed earlier. Other breeds also exhibited LD decay as per their available breedable  
314 population. Larger the population size, longer the LD decay. Effective population size of  
315 Murrah and Mehsana has drastically declined over last 100 generations. It is believed that  
316 Mehsana breed has been developed a couple of centuries ago from Murrah and Surti  
317 buffalo (might have completed less than 100 generations). Hence, the results should be  
318 viewed in light of theoretical expectations. It gives information regarding effective  
319 population size of ancestors. Shin et al. [43] estimated the effective population size in  
320 Korean cattle which revealed rapid increase in effective population size over the past 10  
321 generations with the values increasing fivefold (close to 500) by 10 generations. Santana et  
322 al. [44] also reported small effective size (40) from several Murrah herds. An effective  
323 population size of at least 50 animals is enough to prevent inbreeding depression, the  
324 minimum level recommended by the FAO (2007).

325 The haplotype block structure and its distribution in the genome of cattle,  
326 especially studies based on high density SNPs, have been rarely reported [45]. Thus, the  
327 current analysis was performed to construct the haplotype structure in the buffalo genome  
328 and to detect the relevant genes affecting quantitative traits. Jiang et al. [46] identified the  
329 milk trait QTL specific SNPs in cattle and found a large proportion of the significant SNPs  
330 (61 out of 105) were located on BTA14 and that were also located within the reported  
331 QTL regions. In our study, 76 QTLs (mostly of milk protein percentage, milk yield and  
332 milk fat per cents) on chromosome 20 concordant with 13 LD blocks. Mai et al. [47]  
333 recognized total 98 QTLs for milk production trait, which included 30 for milk index, 50  
334 for fat index, and 18 for protein index. The density of QTLs of body weight was higher on  
335 chromosome 23 along with other productive traits. Mai et al. [47] reported a greater  
336 number of significant SNPs associations for production (54) than for fertility traits (29)  
337 with 22 QTL regions associated with fertility traits and 14 with production traits. The  
338 concordance study of meat and carcass trait revealed that the largest QTL of shear force  
339 was observed on chromosome 6 and QTL of tridecylic acid content located on  
340 chromosome 15. Wu et al. [48] studied the carcass trait of Simmental cattle, and identified  
341 the genes in the beef cattle genome significantly associated with foreshank weight and  
342 triglyceride levels. A total of 12 and 7 SNPs in the bovine genome were significantly  
343 associated with foreshank weight and triglyceride levels, respectively.

344 In concordance analysis of exterior traits, majorly the QTLs were associated with  
345 udder traits (udder swelling score QTL, udder depth QTL, udder attachment QTL, teat  
346 length QTL etc.). This information of genotypes could be used to associate phenotypes and  
347 perform the selection. Based on the above results, we can assumed that exterior traits are  
348 less important for association of QTL with LD block or haplotypes due to insufficient size  
349 of QTL and low proportion of concordant QTL with LD blocks. van den Berg et al. [49]  
350 studied the concordance for a leg conformation trait in dairy cattle and QTL status was  
351 used in a concordance analysis to reduce the number of candidate mutations. In the  
352 concordance study of health trait, QTLs associated with somatic cell count were observed  
353 almost on every chromosome. The larger size QTL of cold tolerance was observed on  
354 chromosome seven. Higher numbers of QTLs associated with Bovine tuberculosis  
355 susceptibility were found on chromosome 20 and QTLs for clinical mastitis found on  
356 chromosome 14 as well as on chromosome 24. Raphaka et al. [50] identified the markers  
357 associated with tuberculosis on *Bos taurus* autosomes (BTA) 2 and on BTA 23 and  
358 concluded a major role of BTA 23 for susceptibility to bovine Tuberculosis.

## 359 **Conclusion**

360 The study of population structure analysis in Indian buffalo based on SNPs  
361 revealed that the distribution of SNP markers across the buffalo genome of all breeds  
362 studied was almost similar. Minor differences were observed in various genetic parameters  
363 ( $H_E$ ,  $H_O$ ,  $F_{IS}$ ,  $F_{ST}$ ). The levels of SNPs variation in this study could be insufficient to  
364 differentiate the other local breed except Pandharpuri and Jaffarabadi (phenotypically  
365 distinct breeds), so there is a need to develop SNP chip based on SNP markers identified

366 by sequence information of local breeds. LD block-QTLs concordance study could explore  
367 a new window for genomic selection in animals.

368           The cattle genome-based SNP information (UMD\_3.1) does not offer an optimal  
369 coverage for buffalo genome, thereafter the development of new SNP chip based on  
370 information of buffalo genome and buffalo-specific genetic technologies is warranted.

371

## References

372

1. Baker C, Manwell C (1980) Chemical classification of cattle. 1. Breed groups. *Animal Blood Groups and Biochemical Genetics* 11: 127-150.

373

374

2. Barendse W, Harrison BE, Bunch RJ, Thomas MB, Turner LB (2009) Genome wide signatures of positive selection: the comparison of independent samples and the identification of regions associated to traits. *BMC genomics* 10: 1.

375

376

377

3. Gouveia JJdS, Silva MVGBd, Paiva SR, Oliveira SMPd (2014) Identification of selection signatures in livestock species. *Genetics and molecular biology* 37: 330-342.

378

379

380

4. Department of Animal Husbandry, Dairying and Fisheries, Govt. of India (2015) Annual Report 2015-16.

381

382

5. Food and Agricultural Organisation, UN (2007) The state of the world's Animal Genetic Resources for Food and Ariculture.

383

384

6. Purcell S, Neale B, Todd-Brown K, Thomas L, Ferreira MA, Bender D, et al. (2007) PLINK: a tool set for whole-genome association and population-based linkage analyses. *Am J Hum Genet* 81: 559-575.

385

386

387

7. Purcell S, Neale B, Todd-Brown K, Thomas L, Ferreira MA, Bender D, et al. (2007) PLINK: a tool set for whole-genome association and population-based linkage analyses. *The American Journal of Human Genetics* 81: 559-575.

388

389

390

8. Wickham H (2009) *ggplot2: Elegant Graphics for Data Analysis*.

391

9. Plotree D, Plotgram D (1989) PHYLIP-phylogeny inference package (version 3.2). *Cladistics* 5: 6.

392

393

10. Barbato M, Orozco-terWengel P, Tapio M, Bruford MW (2015) SNeP: a tool to estimate trends in recent effective population size trajectories using genome-wide SNP data. *Frontiers in Genetics* 6.

394

395

396

11. Purcell S, Neale B, Todd-Brown K, Thomas L, Ferreira MA, Bender D, et al. (2007) PLINK: a tool set for whole-genome association and population-based linkage analyses. *American Journal of Human Genetics* 81: 559-575.

397

398

399

12. Ligges U, Mächler M (2003) Scatterplot3d - an R Package for Visualizing Multivariate Data. *Journal of Statistical Software. Journal of Statistical Software* 8: 1-20.

400

401

13. Raj A, Stephens M, Pritchard JK (2014) fastSTRUCTURE: variational inference of population structure in large SNP data sets. *Genetics* 197: 573-589.

402

403

14. Barrett JC, Fry B, Maller J, Daly MJ (2004) Haploview: analysis and visualization of LD and haplotype maps. *Bioinformatics* 21: 263-265.

404

405

15. Patil N, Berno AJ, Hinds DA, Barrett WA, Doshi JM, Hacker CR, et al. (2001) Blocks of limited haplotype diversity revealed by high-resolution scanning of human chromosome 21. *Science* 294: 1719-1723.

406

407

408

16. Zhang K, Sun F, Waterman MS, Chen T. Dynamic programming algorithms for haplotype block partitioning: applications to human chromosome 21 haplotype data; 2003. ACM. pp. 332-340.

409

410

411

17. Zhang K, Deng M, Chen T, Waterman MS, Sun F (2002) A dynamic programming algorithm for haplotype block partitioning. *Proceedings of the National Academy of Sciences* 99: 7335-7339.

412

413

414

18. Anderson EC, Novembre J (2003) Finding haplotype block boundaries by using the minimum-description-length principle. *The American Journal of Human Genetics* 73: 336-354.

415

416

417

19. Gabriel S, Schaffner S, Nguyen H, Moore J, Roy J, Blumenstiel B (2002) The structure of haplotype blocks in the human genome. *Science* 296.

418

- 419 20. Qin ZS, Niu T, Liu JS (2002) Partition-ligation–expectation-maximization algorithm  
420 for haplotype inference with single-nucleotide polymorphisms. *The American*  
421 *Journal of Human Genetics* 71: 1242-1247.
- 422 21. Hu ZL, Park CA, Wu XL, Reecy JM (2013) Animal QTLdb: an improved database  
423 tool for livestock animal QTL/association data dissemination in the post-genome  
424 era. *Nucleic Acids Research* 41: D871-879.
- 425 22. Quinlan AR, Hall IM (2010) BEDTools: a flexible suite of utilities for comparing  
426 genomic features. *Bioinformatics* 26: 841-842.
- 427 23. Kataria R, Sunder S, Malik G, Mukesh M, Kathiravan P, Mishra B (2009) Genetic  
428 diversity and bottleneck analysis of Nagpuri buffalo breed of India based on  
429 microsatellite data. *Russian journal of genetics* 45: 826-832.
- 430 24. Joshi J, Salar R, Banerjee P (2013) Genetic Variation and Phylogenetic Relationships  
431 of Indian Buffaloes of Uttar Pradesh. *Asian-Australasian Journal of Animal*  
432 *Sciences* 26: 1229.
- 433 25. Kumar S, Gupta J, Kumar N, Dikshit K, Navani N, Jain P, et al. (2006) Genetic  
434 variation and relationships among eight Indian riverine buffalo breeds. *Molecular*  
435 *Ecology* 15: 593-600.
- 436 26. Joshi J, Salar R, Banerjee P, Sharma U, Tantia M, Vijh R (2015) Assessment of  
437 Genetic Variability and Structuring of Riverine Buffalo Population (*Bubalus*  
438 *bubalis*) of Indo-Gangetic Basin. *Animal Biotechnology* 26: 148-155.
- 439 27. Tantia M, Vijh R, Mishra B, Kumar S, Arora R (2006) Multilocus genotyping to study  
440 population structure in three buffalo populations of India. *ASIAN*  
441 *AUSTRALASIAN JOURNAL OF ANIMAL SCIENCES* 19: 1071.
- 442 28. Pundir R, Sahana G, Navani N, Jain P, Singh D, Kumar S, et al. (2000)  
443 Characterization of Mehsana buffaloes in India. *Animal Genetic Resources* 28: 53-  
444 62.
- 445 29. Dash S, Singh A, Bhatia A, Jayakumar S, Sharma A, Singh S, et al. (2017) Evaluation  
446 of Bovine High-Density SNP Genotyping Array in Indigenous Dairy Cattle Breeds.  
447 *Animal Biotechnology*: 1-7.
- 448 30. Iamartino D, Williams JL, Sonstegard T, Reecy J, Tassell Cv, Nicolazzi EL, et al.  
449 (2013) The buffalo genome and the application of genomics in animal management  
450 and improvement. *Buffalo Bulletin* 32: 151-158.
- 451 31. MacEachern S, Hayes B, McEwan J, Goddard M (2009) An examination of positive  
452 selection and changing effective population size in Angus and Holstein cattle  
453 populations (*Bos taurus*) using a high density SNP genotyping platform and the  
454 contribution of ancient polymorphism to genomic diversity in Domestic cattle.  
455 *BMC Genomics* 10: 181.
- 456 32. Dadi H, Kim JJ, Kim KS, Yoon D (2012) Evaluation of Single Nucleotide  
457 Polymorphisms (SNPs) Genotyped by the Illumina Bovine SNP50K in Cattle  
458 Focusing on Hanwoo Breed. *Asian-Australasian Journal of Animal Sciences* 25:  
459 28-32.
- 460 33. Lango-Allen H, Estrada K, Lettre G, Berndt SI, Weedon MN, Rivadeneira F, et al.  
461 (2010) Hundreds of variants clustered in genomic loci and biological pathways  
462 affect human height. *Nature* 467: 832-838.
- 463 34. Edea Z, Bhuiyan MS, Dessie T, Rothschild MF, Dadi H, Kim KS (2015) Genome-  
464 wide genetic diversity, population structure and admixture analysis in African and  
465 Asian cattle breeds. *Animal* 9: 218-226.
- 466 35. Kim ES, Sonstegard TS, Rothschild MF (2015) Recent artificial selection in U.S.  
467 Jersey cattle impacts autozygosity levels of specific genomic regions. *BMC*  
468 *Genomics* 16: 302.

- 469 36. McKay SD, Schnabel RD, Murdoch BM, Matukumalli LK, Aerts J, Coppieters W, et  
470 al. (2008) An assessment of population structure in eight breeds of cattle using a  
471 whole genome SNP panel. *BMC Genetics* 9: 37.
- 472 37. Sraphet S, Moolmuang B, Na-Chiangmai A, Panyim S, Smith DR, Triwitayakorn K  
473 (2008) Use of cattle microsatellite markers to assess genetic diversity of Thai  
474 Swamp buffalo (*Bubalus bubalis*). *Asian-Australasian Journal of Animal Sciences*  
475 21: 177.
- 476 38. Suh S, Kim Y-S, Cho C-Y, Byun M-J, Choi S-B, Ko Y-G, et al. (2014) Assessment of  
477 genetic diversity, relationships and structure among Korean native cattle breeds  
478 using microsatellite markers. *Asian-Australasian Journal of Animal Sciences* 27:  
479 1548.
- 480 39. Machado MA, Schuster I, Martinez ML, Campos AL (2003) Genetic diversity of four  
481 cattle breeds using microsatellite markers. *Revista Brasileira de zootecnia* 32: 93-  
482 98.
- 483 40. Melka MG, Schenkel FS (2012) Analysis of genetic diversity in Brown Swiss, Jersey  
484 and Holstein populations using genome-wide single nucleotide polymorphism  
485 markers. *BMC Research Notes* 5: 161.
- 486 41. Shah TM, Patel JS, Bhong CD, Doiphode A, Umrikar UD, Parmar SS, et al. (2013)  
487 Evaluation of genetic diversity and population structure of west-central Indian  
488 cattle breeds. *Animal Genetics* 44: 442-445.
- 489 42. Kumar S, Nagarajan M, Sandhu JS, Kumar N, Behl V (2007) Phylogeography and  
490 domestication of Indian river buffalo. *BMC Evolutionary Biology* 7: 186.
- 491 43. Shin DH, Cho KH, Park KD, Lee HJ, Kim H (2013) Accurate Estimation of Effective  
492 Population Size in the Korean Dairy Cattle Based on Linkage Disequilibrium  
493 Corrected by Genomic Relationship Matrix. *Asian-Australasian Journal of Animal  
494 Sciences* 26: 1672-1679.
- 495 44. Santana M, Aspilcueta-Borquis R, Bignardi A, Albuquerque LG, Tonhati H (2011)  
496 Population structure and effects of inbreeding on milk yield and quality of Murrah  
497 buffaloes. *Journal of Dairy Science* 94: 5204-5211.
- 498 45. Villa-Angulo R, Matukumalli LK, Gill CA, Choi J, Van Tassell CP, Grefenstette JJ  
499 (2009) High-resolution haplotype block structure in the cattle genome. *BMC  
500 Genetics* 10: 19.
- 501 46. Jiang L, Liu J, Sun D, Ma P, Ding X, Yu Y, et al. (2010) Genome wide association  
502 studies for milk production traits in Chinese Holstein population. *PloS One* 5:  
503 e13661.
- 504 47. Mai M, Sahana G, Christiansen F, Guldbbrandtsen B (2010) A genome-wide association  
505 study for milk production traits in Danish Jersey cattle using a 50K single  
506 nucleotide polymorphism chip. *Journal of animal science* 88: 3522-3528.
- 507 48. Wu Y, Fan H, Wang Y, Zhang L, Gao X, Chen Y, et al. (2014) Genome-wide  
508 association studies using haplotypes and individual SNPs in Simmental cattle.  
509 *PLoS One* 9: e109330.
- 510 49. van den Berg I, Fritz S, Rodriguez S, Rocha D, Boussaha M, Lund MS, et al. (2014)  
511 Concordance analysis for QTL detection in dairy cattle: a case study of leg  
512 morphology. *Genetics, Selection, Evolution* 46: 31.
- 513 50. Raphaka K, Matika O, Sánchez-Molano E, Mrode R, Coffey MP, Riggio V, et al.  
514 (2017) Genomic regions underlying susceptibility to bovine tuberculosis in  
515 Holstein-Friesian cattle. *BMC Genetics* 18: 27.

516

517 **Figure captions:**

518 **Fig 1: Alternate allele distribution** (A) Distribution of alternate allele frequency in studied  
519 buffalo breed (B) Breed-wise average alternate allele frequency distribution (C)  
520 Breed wise proportion and distribution of alternate allele with allele frequency >  
521 0 (SNPs removed which are monomorphic)  
522 (BBN: Banni, BJF: Jaffarabadi, BMR: Murrah, BNR: Nili-Ravi, BMS: Mehsana,  
523 BPN: Pandharpuri, BST: Surti)

524 **Fig 2: Dendrogram of breed differentiation based on pair-wise  $F_{ST}$  values**  
525 Labelled tree with name of breed at each leaf (BBN: Banni, BJF: Jaffarabadi,  
526 BMR: Murrah, BNR: Nili-Ravi, BMS: Mehsana, BPN: Pandharpuri, BST: Surti)

527 **Fig 3: 2D PCA plot of all seven buffalo breeds together up to principal components 5**  
528 (BBN: Banni, BJF: Jaffarabadi, BMR: Murrah, BNR: Nili-Ravi, BMS: Mehsana,  
529 BPN: Pandharpuri, BST: Surti)

530 **Fig 4: Estimated population structure by fastSTRUCTURE for  $K = 2$  to  $K = 8$**   
531 Each individual is represented by a thin vertical line, and each breed is  
532 demarcated by a thick vertical black line. (BBN: Banni, BJF: Jaffarabadi, BMR:  
533 Murrah, BNR: Nili-Ravi, BMS: Mehsana, BPN: Pandharpuri, BST: Surti)

534 **Fig 5: Linkage Disequilibrium study of Buffalo breeds: (A) Linkage disequilibrium**  
535 **(LD) decay plot based on all pairwise comparisons between adjacent loci of**  
536 **all seven breeds** The horizontal axis depicts the intermarker distance in base pair  
537 and vertical axis shows the average  $R^2$  values (B) **Effective population size ( $N_e$ )**  
538 **of different breeds with respect to generation time** (BBN: Banni, BJF:  
539 Jaffarabadi, BMR: Murrah, BNR: Nili-Ravi, BMS: Mehsana, BPN: Pandharpuri,  
540 BST: Surti)

541 **Fig 6: LD blocks distribution based on size of block in respective class of size (in kb)**

542 **Fig 7: Concordance of LD blocks with QTLs (A) Milk production traits (B) Production**  
543 **traits (C) Reproduction traits (D) Meat and carcass traits (E) Health trait**  
544 **and (F) Exterior traits**  
545 Vertical axis shows the chromosome number, horizontal axis shows the base pair  
546 position, thick middle black bar shows physical length of chromosome, thin  
547 orange colored bars over black bars shows LD blocks and the colored segments  
548 reflects the physical length of QTLs.

549 **Fig 8: Trait based dendrogram of studied buffalo breeds (A) Dendrogram of studied**  
550 **buffalo breeds based on markers covered by fat percentage QTLs (Fat**  
551 **percentage was sourced from INAPH data, NDDDB and ICAR) (B)**  
552 **Dendrogram of studied buffalo breeds based on markers covered by body**  
553 **weight QTLs (Body weight was sourced from ICAR)** (BBN: Banni, BJF:  
554 Jaffarabadi, BMR: Murrah, BNR: Nili-Ravi, BMS: Mehsana, BPN: Pandharpuri,  
555 BST: Surti)

556

## Tables:

557

**Table 1: Genetic diversity parameters in Indian buffalo breeds from genotyped data**

| <b>Breed</b>       | <b>Observed Heterozygosity, Ho<br/>(Mean ±SE)</b> | <b>Expected Heterozygosity, He<br/>(Mean ±SE)</b> | <b>F<sub>IS</sub> (Mean±SE)</b> |
|--------------------|---------------------------------------------------|---------------------------------------------------|---------------------------------|
| <b>Banni</b>       | 0.3839± 0.0006                                    | 0.3738±0.0005                                     | -0.0270±0.0036                  |
| <b>Mehsana</b>     | 0.3857±0.0005                                     | 0.3830±0.0005                                     | -0.0070±0.0033                  |
| <b>Nili-Ravi</b>   | 0.3832±0.0006                                     | 0.3799±0.0005                                     | -0.0089±0.0072                  |
| <b>Pandharpuri</b> | 0.3719±0.0006                                     | 0.3680±0.0005                                     | -0.0107±0.0116                  |
| <b>Jaffarabadi</b> | 0.3839±0.0006                                     | 0.3738±0.0005                                     | -0.0098±0.0031                  |
| <b>Murrah</b>      | 0.3864±0.0005                                     | 0.3846±0.0005                                     | -0.0046±0.0024                  |
| <b>Surti</b>       | 0.3757±0.0007                                     | 0.3643±0.0005                                     | -0.0314±0.0094                  |

558



559 **Table 2: Standard genetic distance or Mean pairwise  $F_{ST}$  values among various buffalo**  
560 **breeds**

| <b>Breed</b>       | <b>Murrah</b> | <b>Nili-Ravi</b> | <b>Mehsana</b> | <b>Jaffarabadi</b> | <b>Banni</b> | <b>Pandharpuri</b> | <b>Surti</b> |
|--------------------|---------------|------------------|----------------|--------------------|--------------|--------------------|--------------|
| <b>Murrah</b>      | 0             |                  |                |                    |              |                    |              |
| <b>Nili-Ravi</b>   | 0.00221       | 0                |                |                    |              |                    |              |
| <b>Mehsana</b>     | 0.00402       | 0.00599          | 0              |                    |              |                    |              |
| <b>Jaffarabadi</b> | 0.00947       | 0.01209          | 0.01794        | 0                  |              |                    |              |
| <b>Banni</b>       | 0.02143       | 0.00790          | 0.00442        | 0.01322            | 0            |                    |              |
| <b>Pandharpuri</b> | 0.01833       | 0.02330          | 0.02188        | 0.02156            | 0.02650      | 0                  |              |
| <b>Surti</b>       | 0.02143       | 0.02430          | 0.01794        | 0.02122            | 0.02650      | 0.03097            | 0            |

561

562 **Table 3: Chromosome wise LD block distribution statistics with total number of LD**  
 563 **blocks, average block size, mean and maximum number of SNPs in blocks**

| Chromosome | Total LD blocks | Mean number of SNPs per block | Max. Number of SNPs in blocks |
|------------|-----------------|-------------------------------|-------------------------------|
| 1          | 99              | 3.48                          | 7                             |
| 2          | 87              | 3.68                          | 9                             |
| 3          | 59              | 3.25                          | 6                             |
| 4          | 58              | 3.44                          | 8                             |
| 5          | 63              | 3.73                          | 15                            |
| 6          | 43              | 3.72                          | 9                             |
| 7          | 44              | 3.72                          | 15                            |
| 8          | 52              | 3.75                          | 10                            |
| 9          | 39              | 4.00                          | 8                             |
| 10         | 36              | 3.94                          | 6                             |
| 11         | 54              | 3.51                          | 9                             |
| 12         | 37              | 3.75                          | 9                             |
| 13         | 38              | 3.34                          | 9                             |
| 14         | 31              | 2.93                          | 13                            |
| 15         | 33              | 3                             | 6                             |
| 16         | 44              | 3.56                          | 12                            |
| 17         | 30              | 3.83                          | 16                            |
| 18         | 24              | 3.04                          | 5                             |
| 19         | 31              | 4.54                          | 11                            |
| 20         | 23              | 3.47                          | 9                             |
| 21         | 36              | 3.94                          | 11                            |
| 22         | 26              | 3.76                          | 13                            |
| 23         | 22              | 3.72                          | 7                             |
| 24         | 27              | 2.96                          | 7                             |
| 25         | 29              | 2.75                          | 9                             |
| 26         | 16              | 3.56                          | 8                             |
| 27         | 23              | 3.34                          | 8                             |
| 28         | 19              | 3.84                          | 7                             |
| 29         | 22              | 3.77                          | 10                            |
| All        | 1145            | 3.56                          |                               |

564

565 **Table 4: Chromosome-wise distribution of LD blocks and QTLs with its percentage of**  
 566 **concordance and discordance**

| Chromosome      | No. of QTLs  | No. of QTLs overlapped by LD blocks | No. of LD blocks | No. of LD blocks overlapped with QTLs | Concordance between QTL and LD blocks in % |
|-----------------|--------------|-------------------------------------|------------------|---------------------------------------|--------------------------------------------|
| 1               | 2403         | 325                                 | 99               | 98                                    | 16.91                                      |
| 2               | 2711         | 163                                 | 87               | 56                                    | 7.83                                       |
| 3               | 2780         | 55                                  | 58               | 43                                    | 3.45                                       |
| 4               | 4440         | 31                                  | 58               | 21                                    | 1.16                                       |
| 5               | 3534         | 103                                 | 63               | 56                                    | 4.42                                       |
| 6               | 10483        | 237                                 | 43               | 41                                    | 2.64                                       |
| 7               | 2089         | 63                                  | 44               | 41                                    | 4.88                                       |
| 8               | 1177         | 55                                  | 52               | 45                                    | 8.14                                       |
| 9               | 1289         | 61                                  | 39               | 21                                    | 6.17                                       |
| 10              | 1839         | 78                                  | 36               | 26                                    | 5.55                                       |
| 11              | 3163         | 118                                 | 54               | 34                                    | 4.72                                       |
| 12              | 1046         | 60                                  | 37               | 26                                    | 7.94                                       |
| 13              | 1775         | 101                                 | 38               | 25                                    | 6.95                                       |
| 14              | 7293         | 38                                  | 31               | 29                                    | 0.91                                       |
| 15              | 1050         | 32                                  | 33               | 32                                    | 5.91                                       |
| 16              | 1236         | 63                                  | 44               | 37                                    | 7.81                                       |
| 17              | 1548         | 47                                  | 30               | 26                                    | 4.63                                       |
| 18              | 1233         | 27                                  | 24               | 21                                    | 3.82                                       |
| 19              | 1735         | 73                                  | 31               | 18                                    | 5.15                                       |
| 20              | 2914         | 140                                 | 23               | 21                                    | 5.48                                       |
| 21              | 1184         | 56                                  | 36               | 23                                    | 6.48                                       |
| 22              | 946          | 38                                  | 26               | 17                                    | 5.66                                       |
| 23              | 1004         | 120                                 | 22               | 21                                    | 13.74                                      |
| 24              | 754          | 11                                  | 27               | 12                                    | 2.94                                       |
| 25              | 1802         | 101                                 | 29               | 25                                    | 6.88                                       |
| 26              | 3856         | 52                                  | 16               | 16                                    | 1.78                                       |
| 27              | 747          | 27                                  | 23               | 19                                    | 5.97                                       |
| 28              | 643          | 27                                  | 19               | 16                                    | 6.50                                       |
| 29              | 1130         | 28                                  | 22               | 17                                    | 3.91                                       |
| <b>Combined</b> | <b>67804</b> | <b>8912</b>                         | <b>1144</b>      | <b>873</b>                            | <b>14.19</b>                               |

567

568

569            **Supporting information captions**

570            **S1 Table: Chromosome-wise distribution of LD-blocks, markers and QTLs for**  
571            **respective Traits**

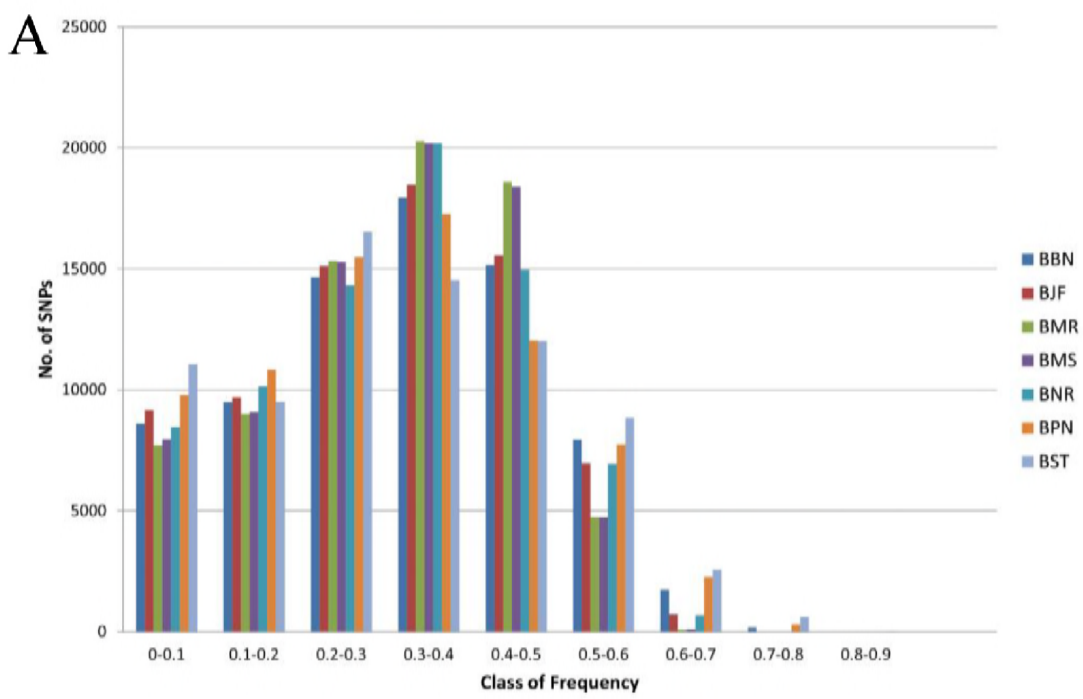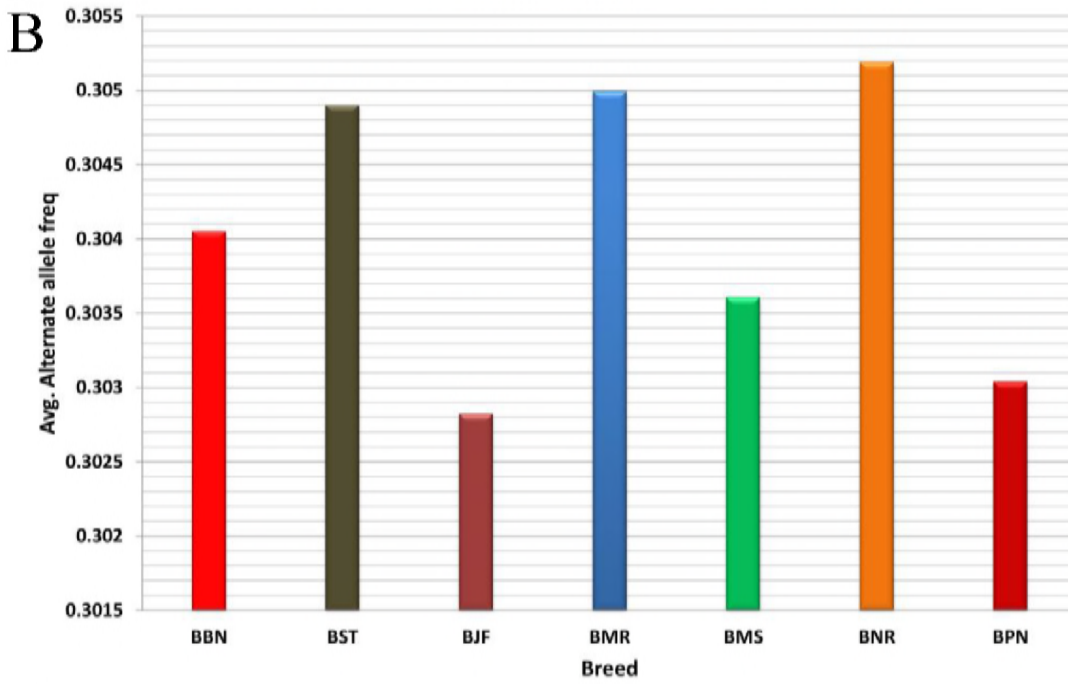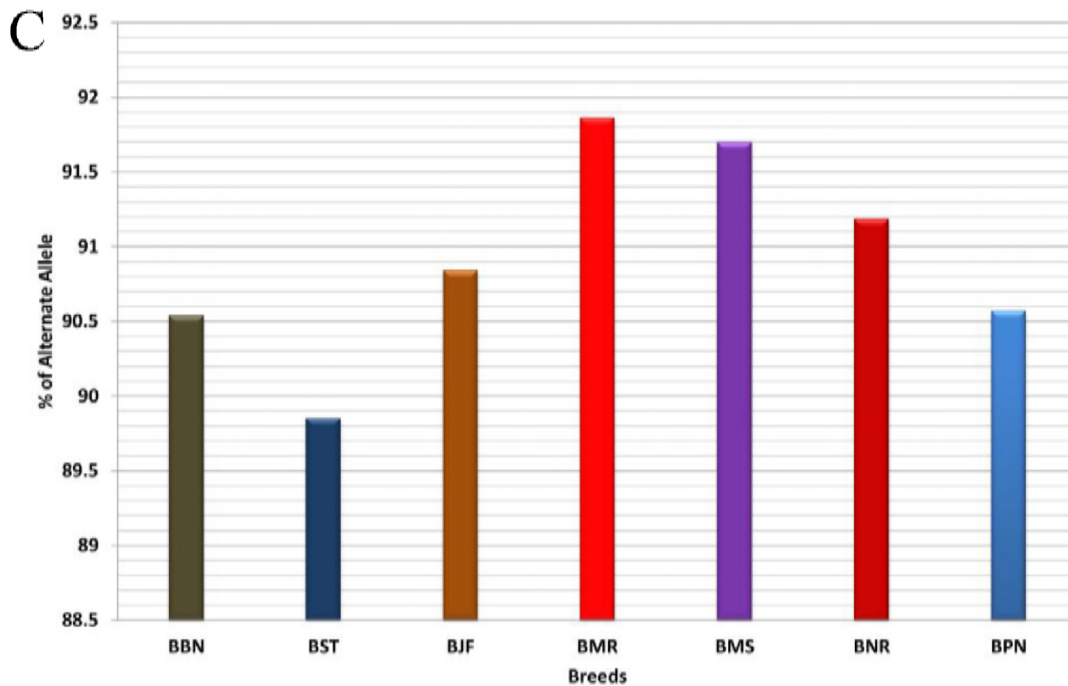

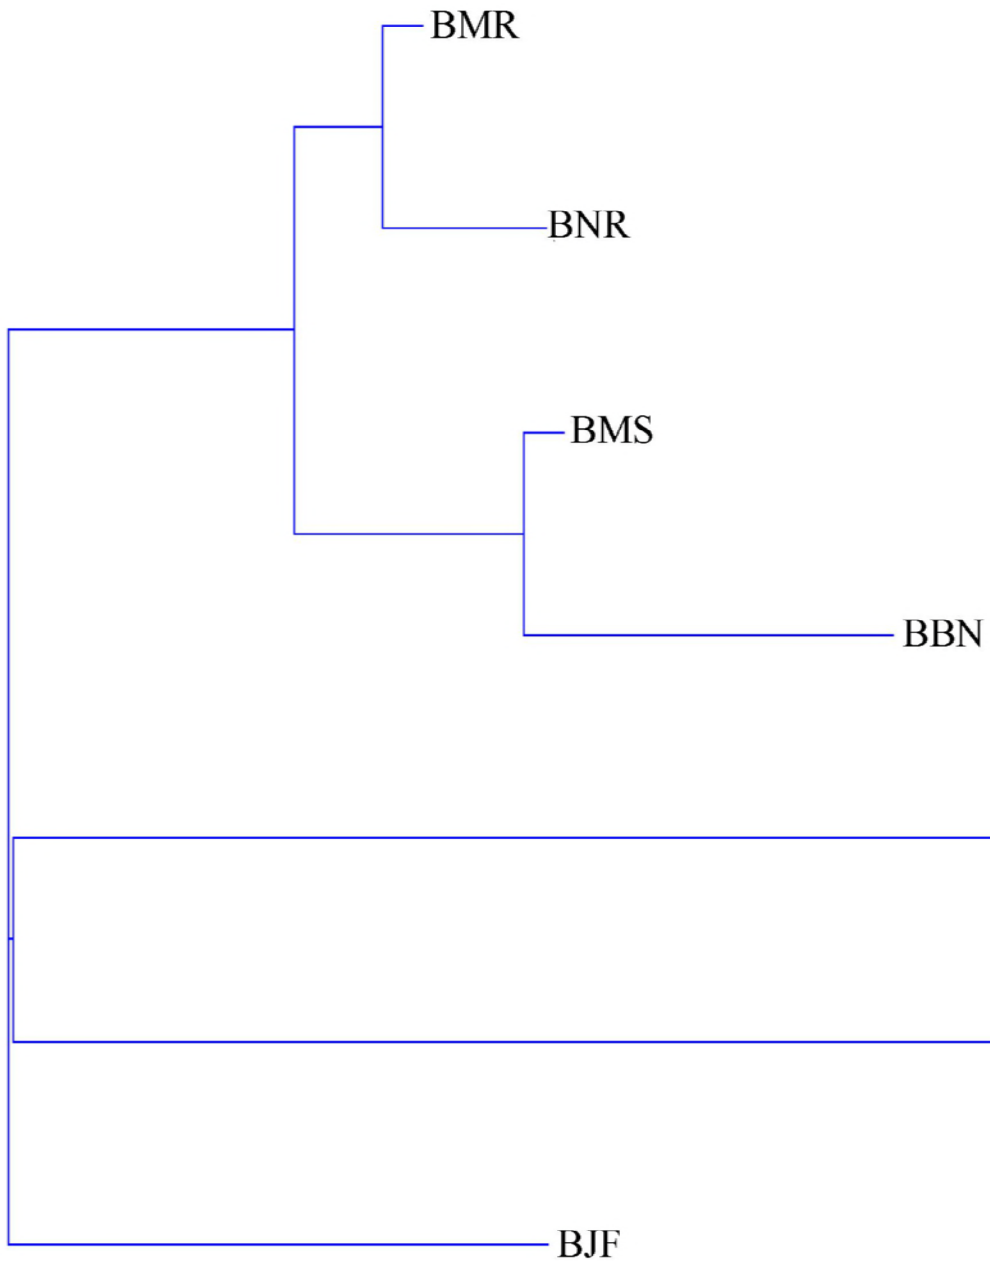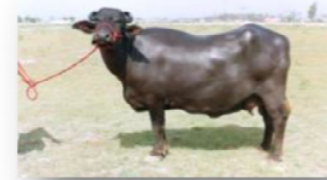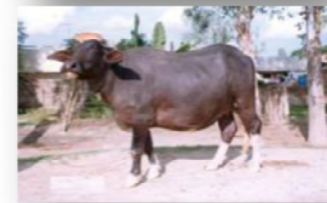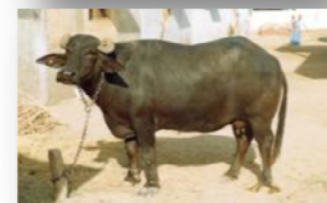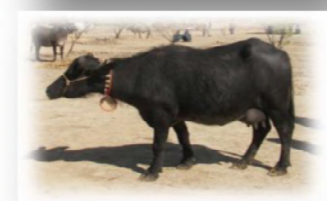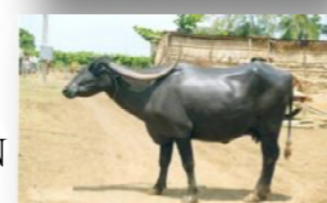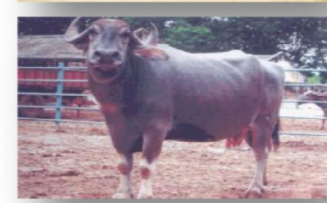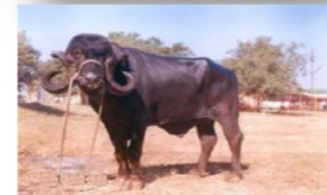

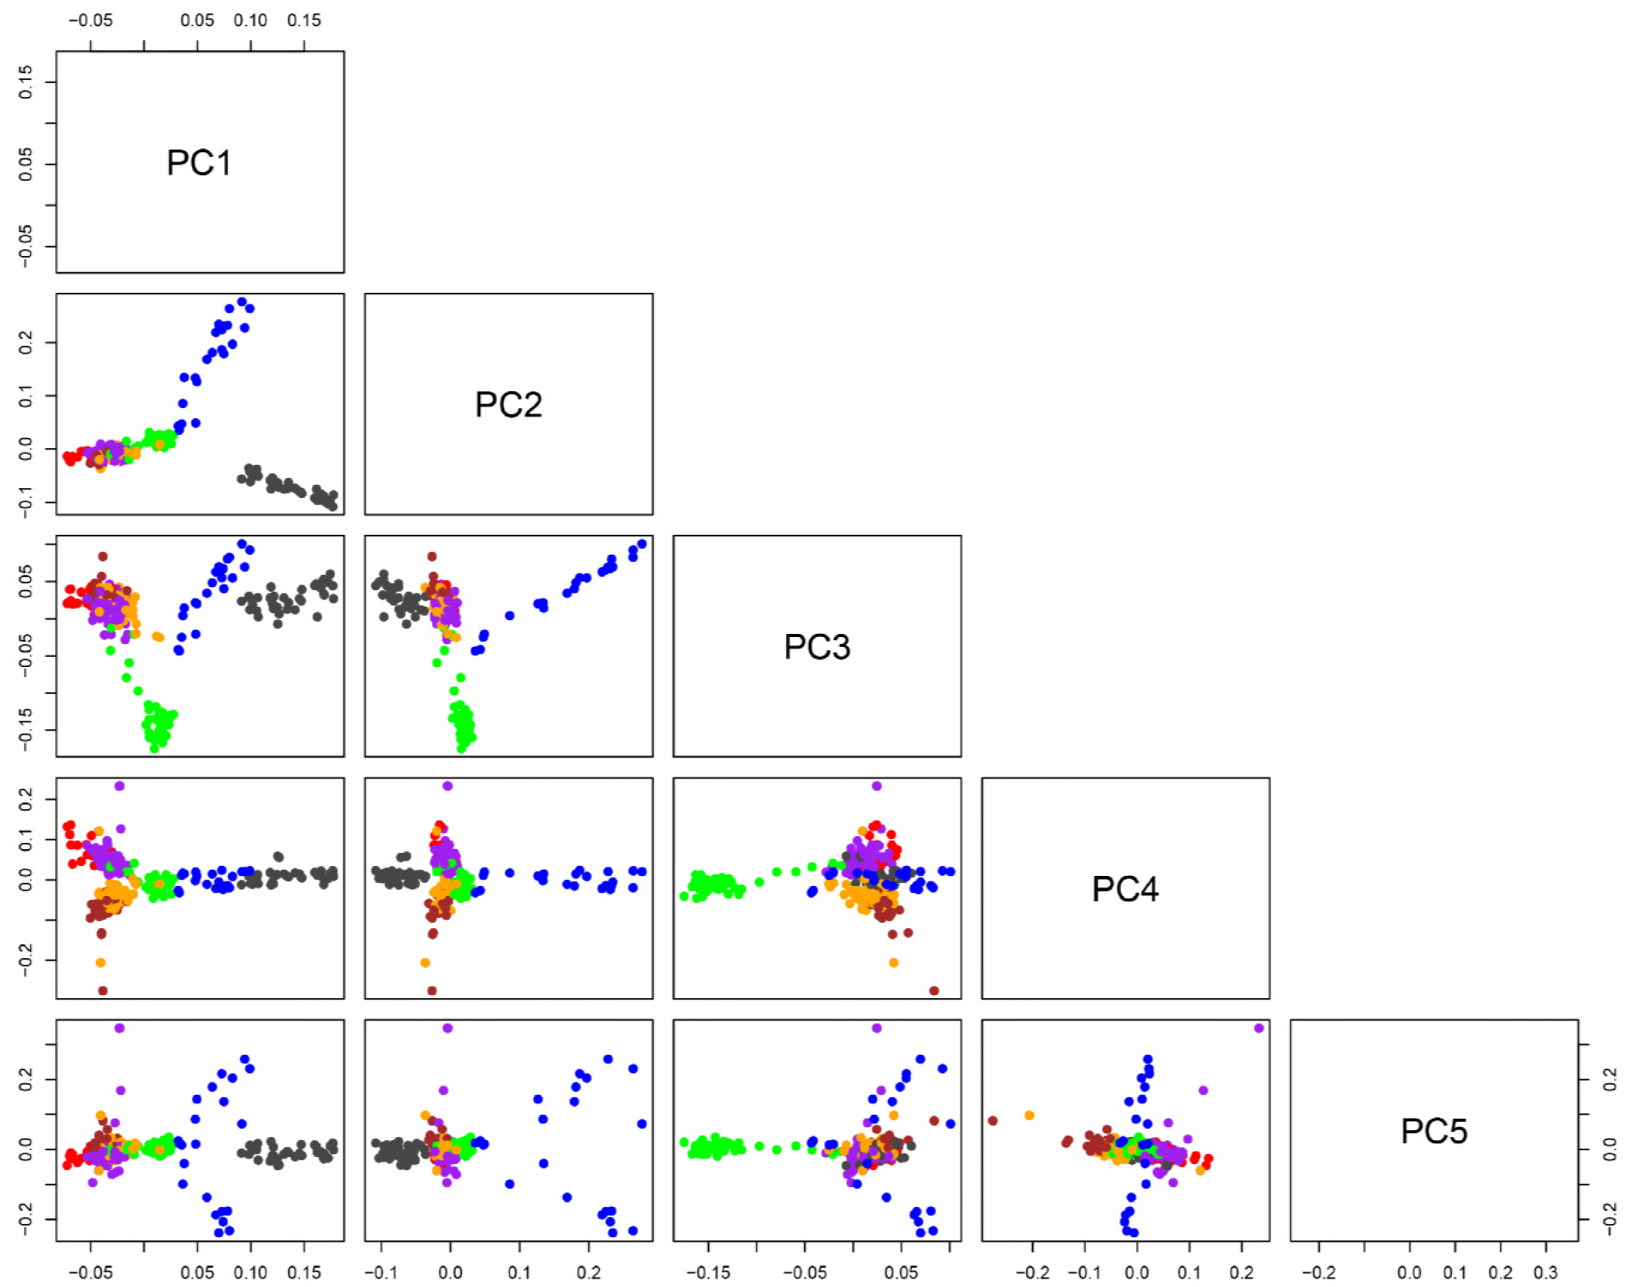

K=2

K=3

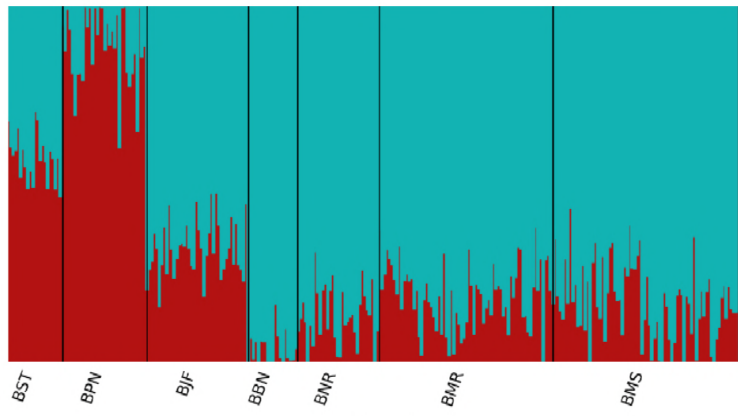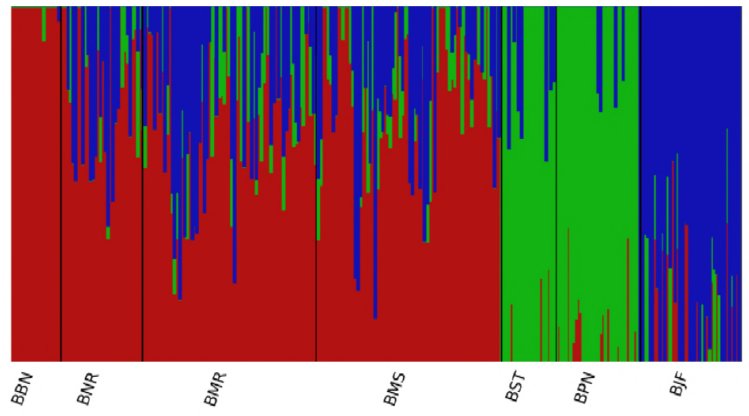

K=4

K=5

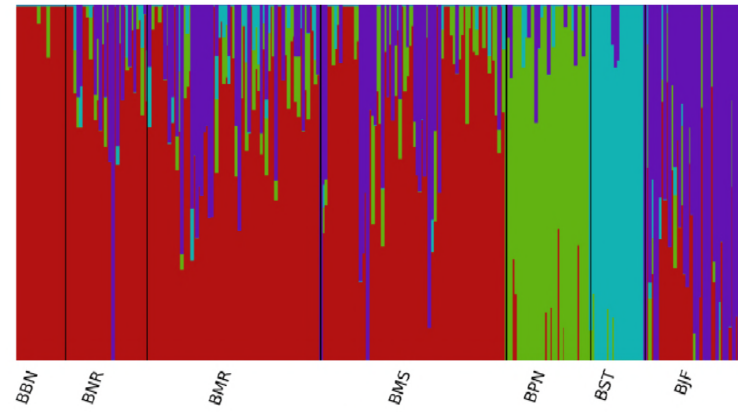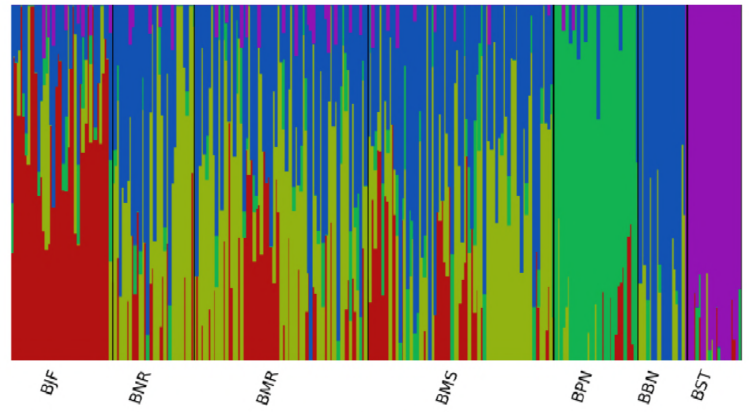

K=6

K=7

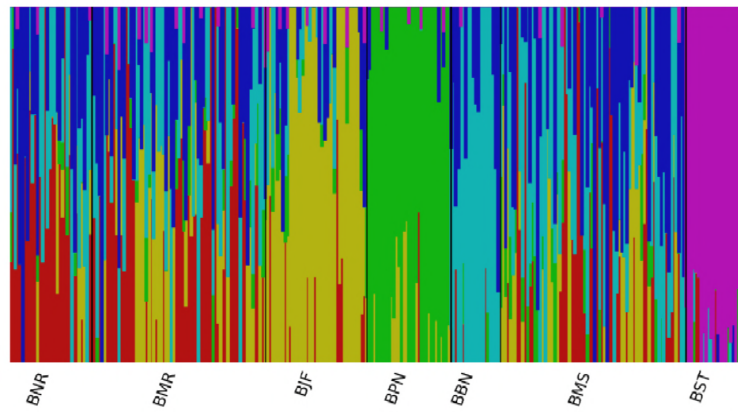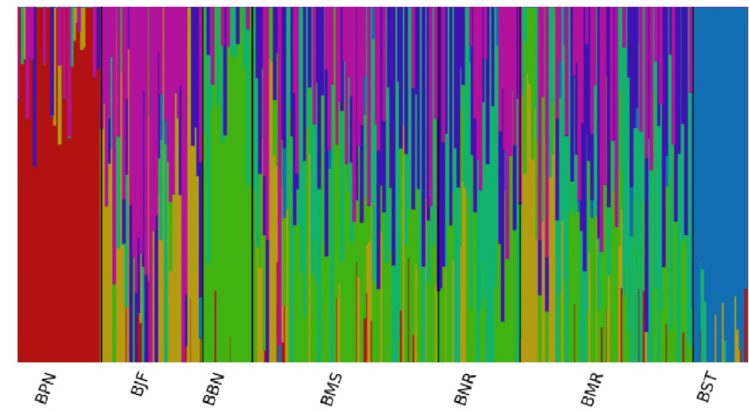

K=8

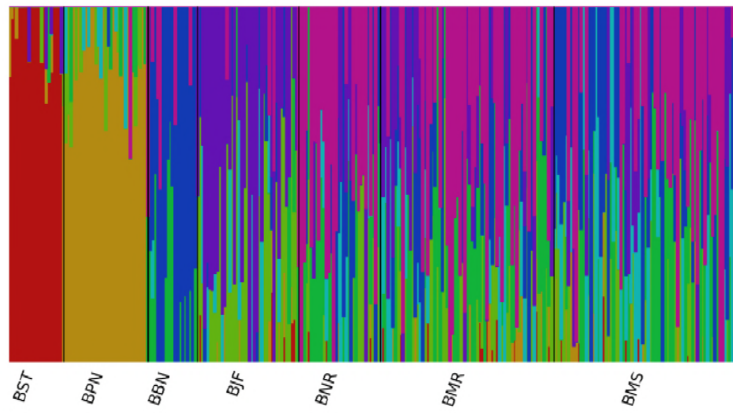



A

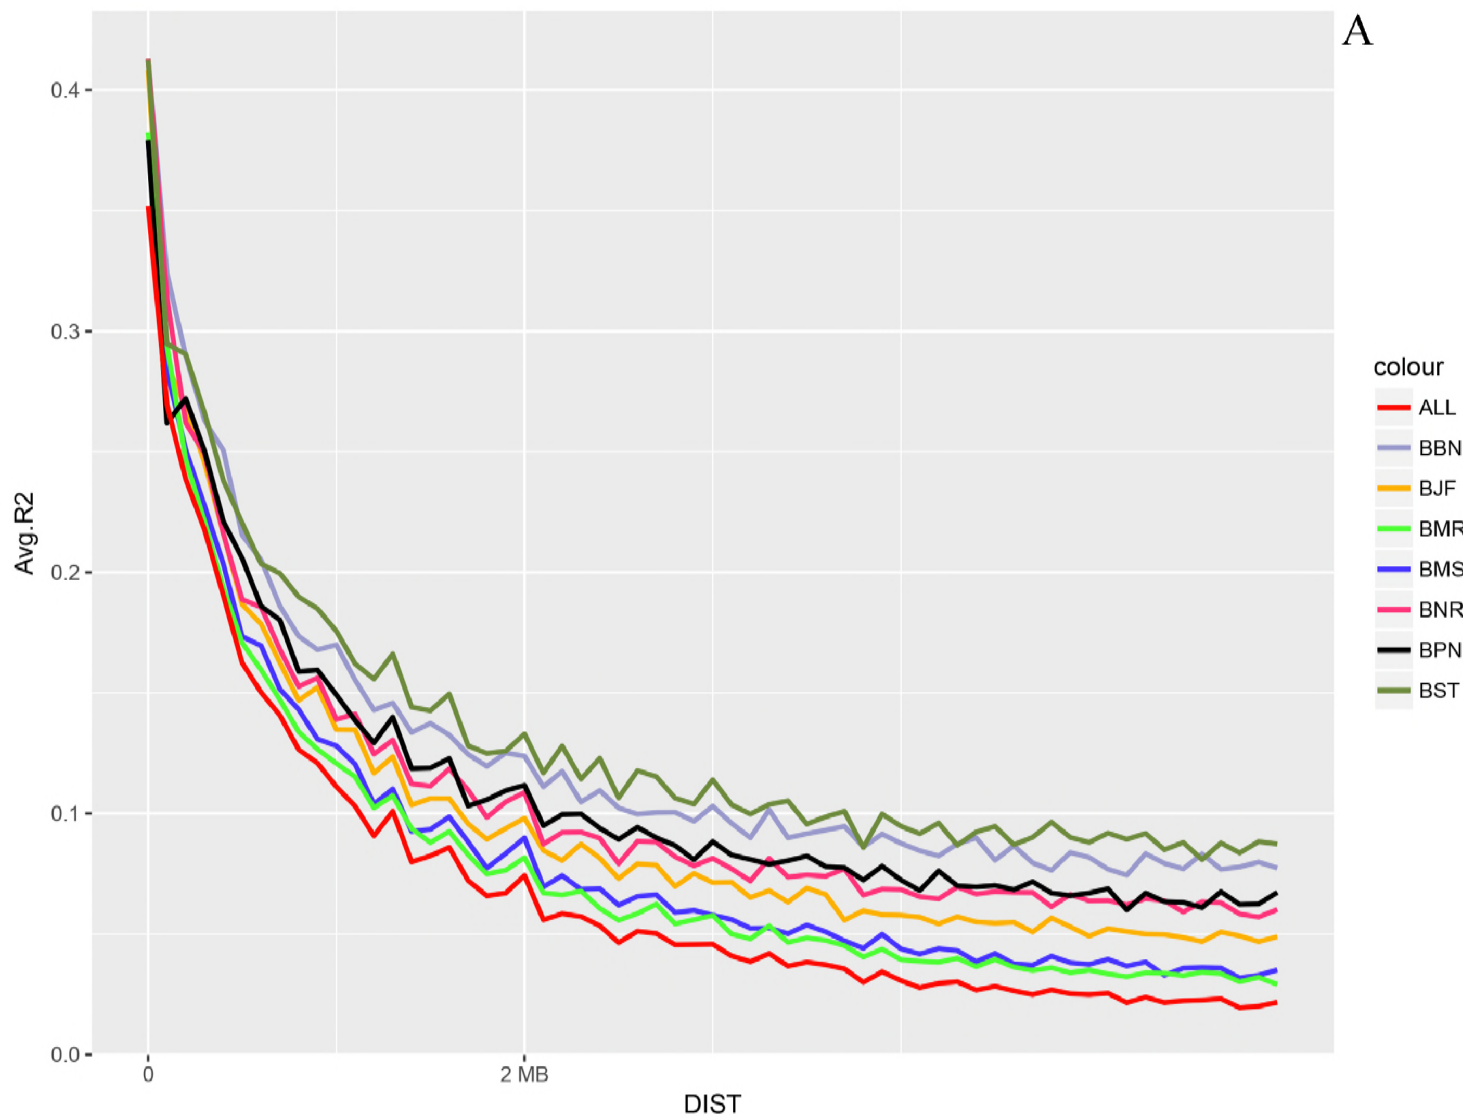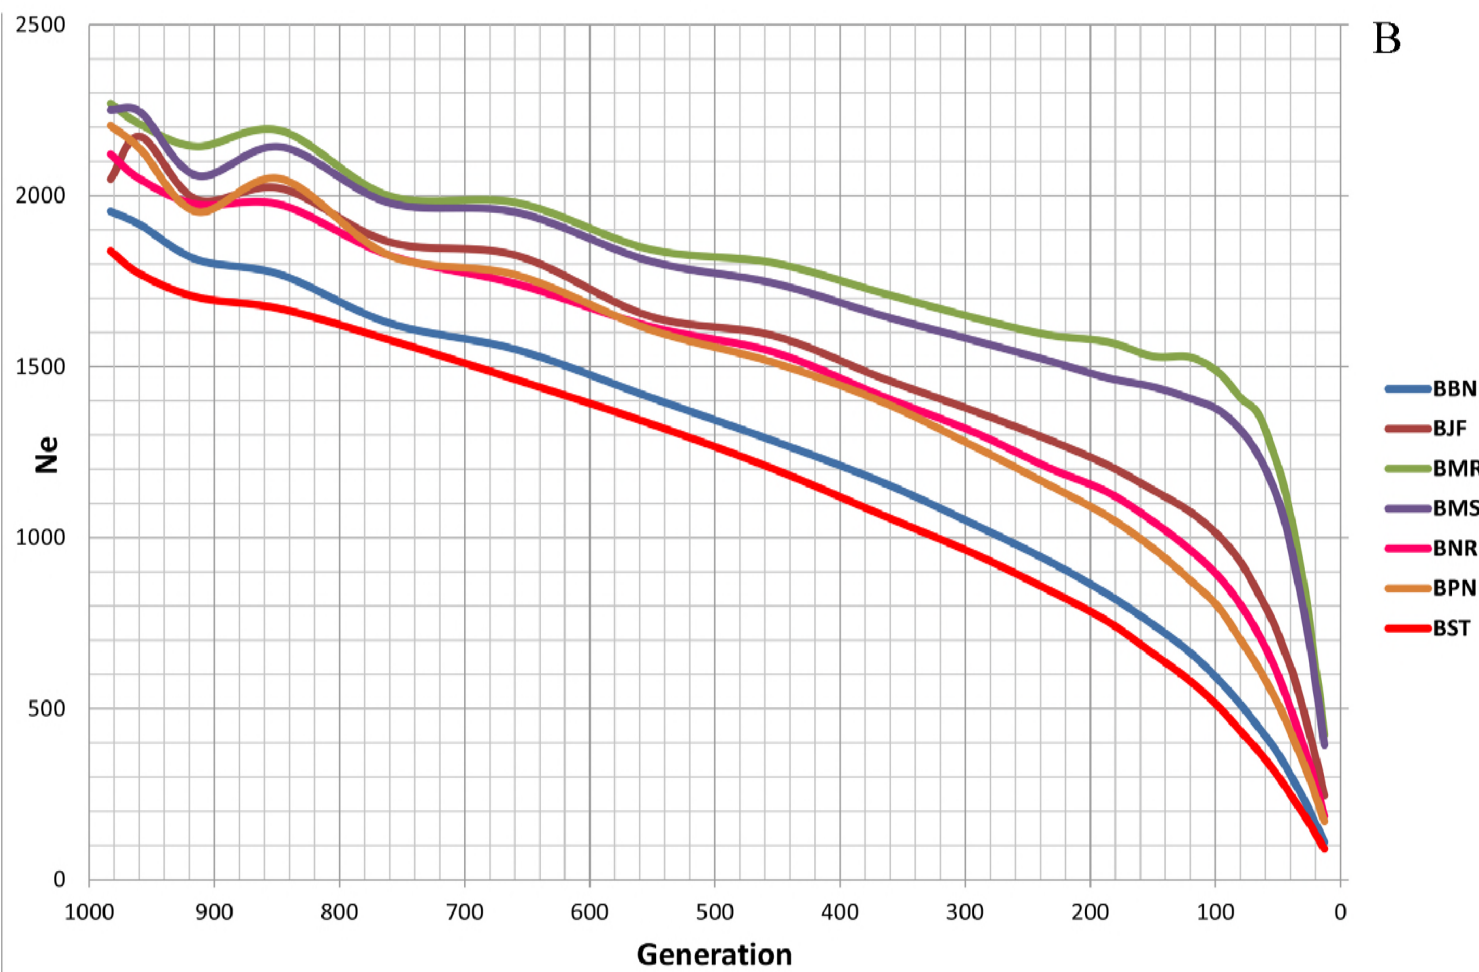

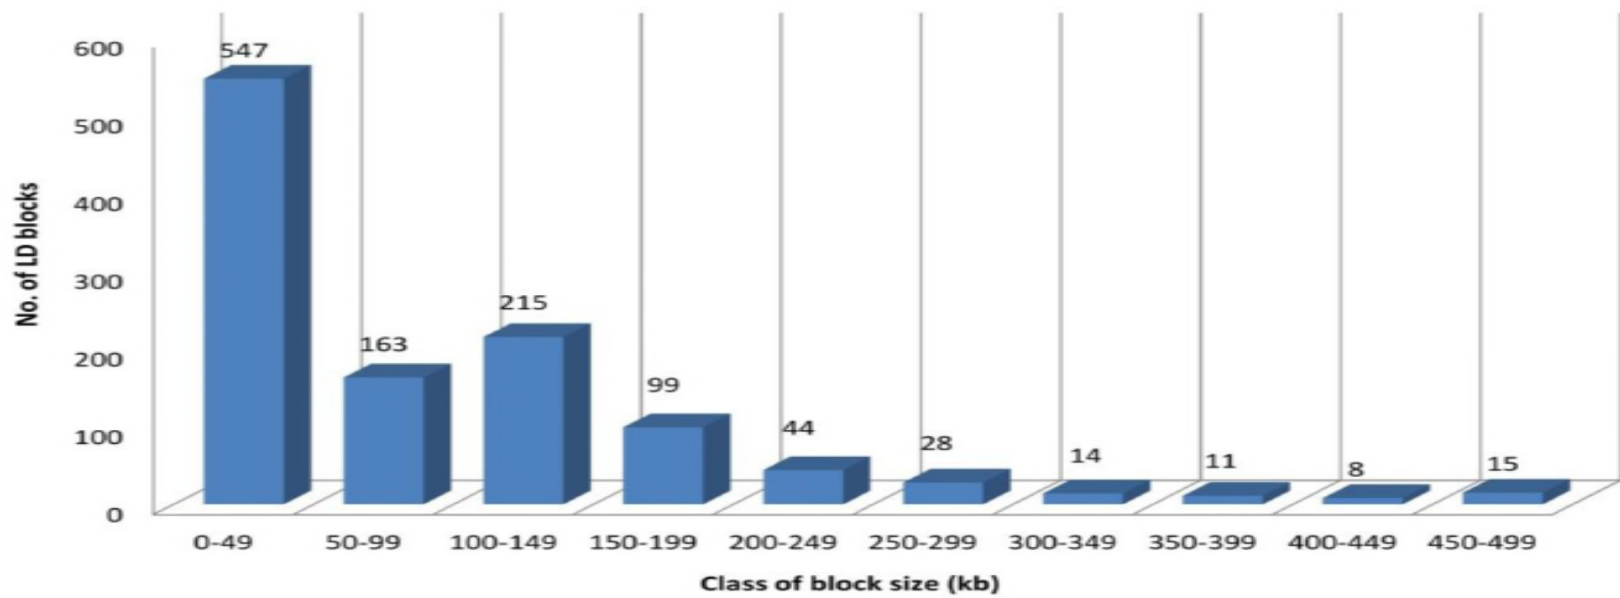

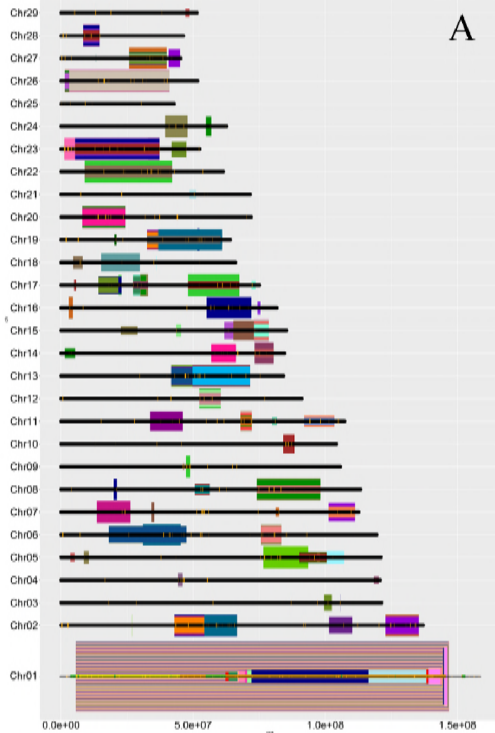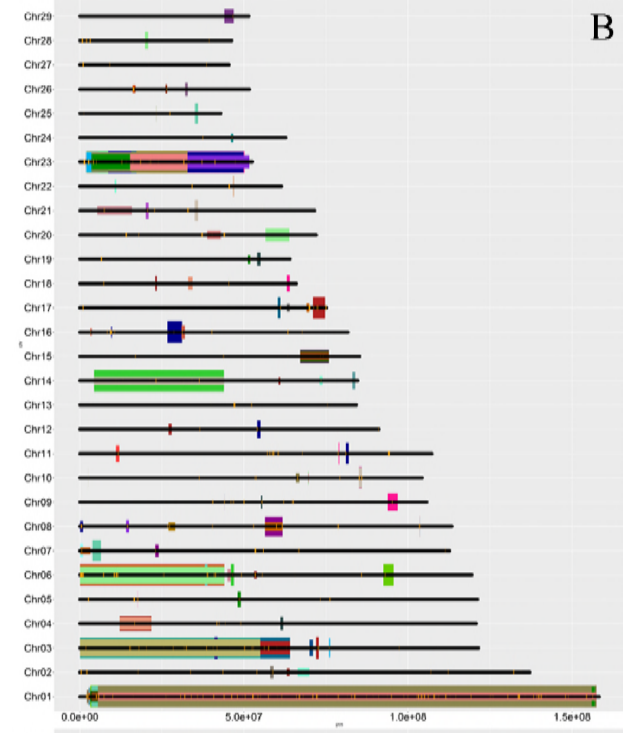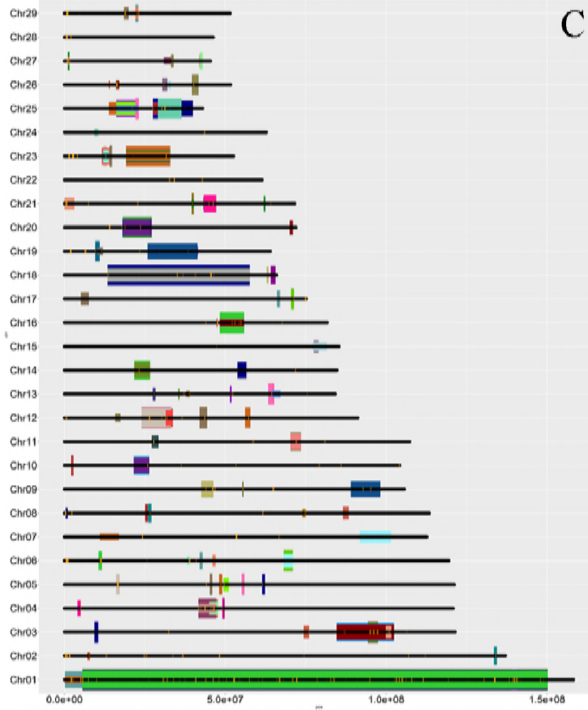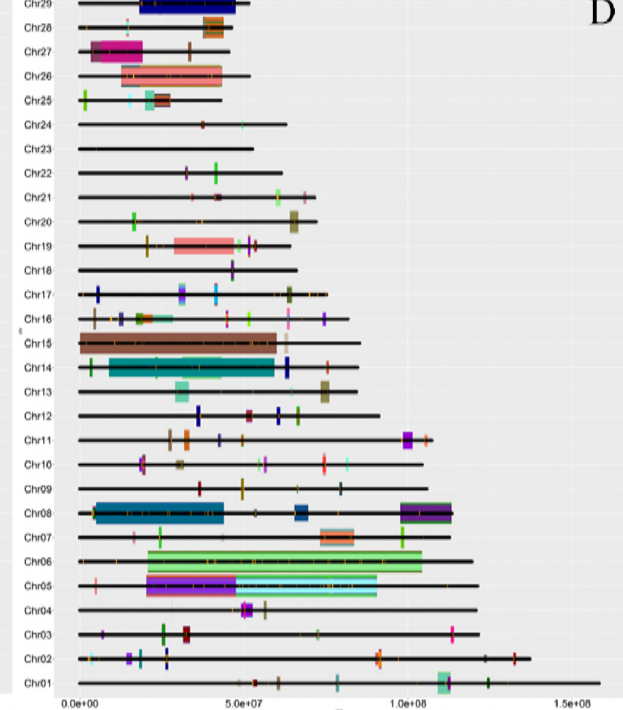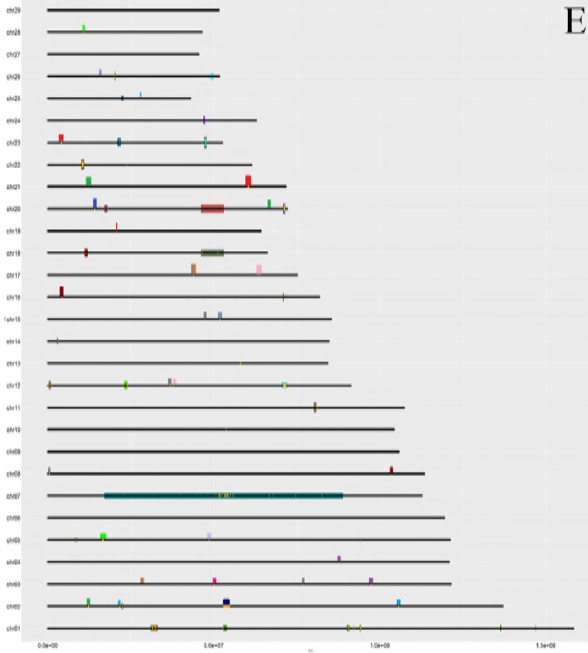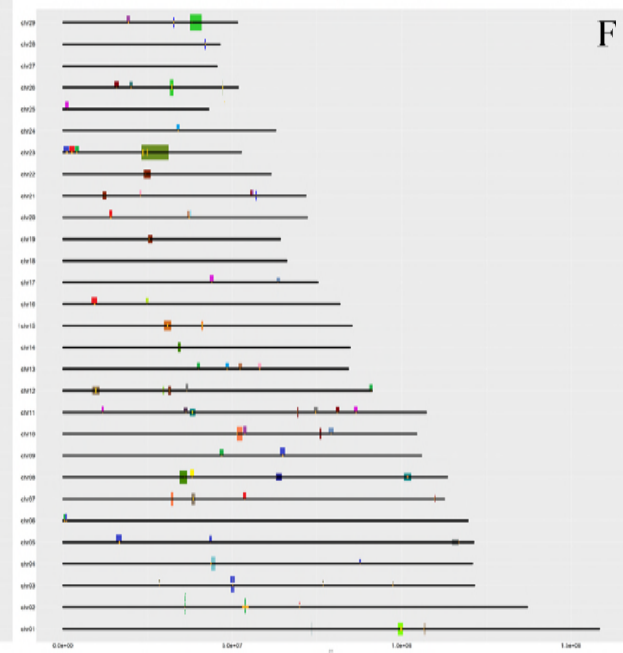

**A**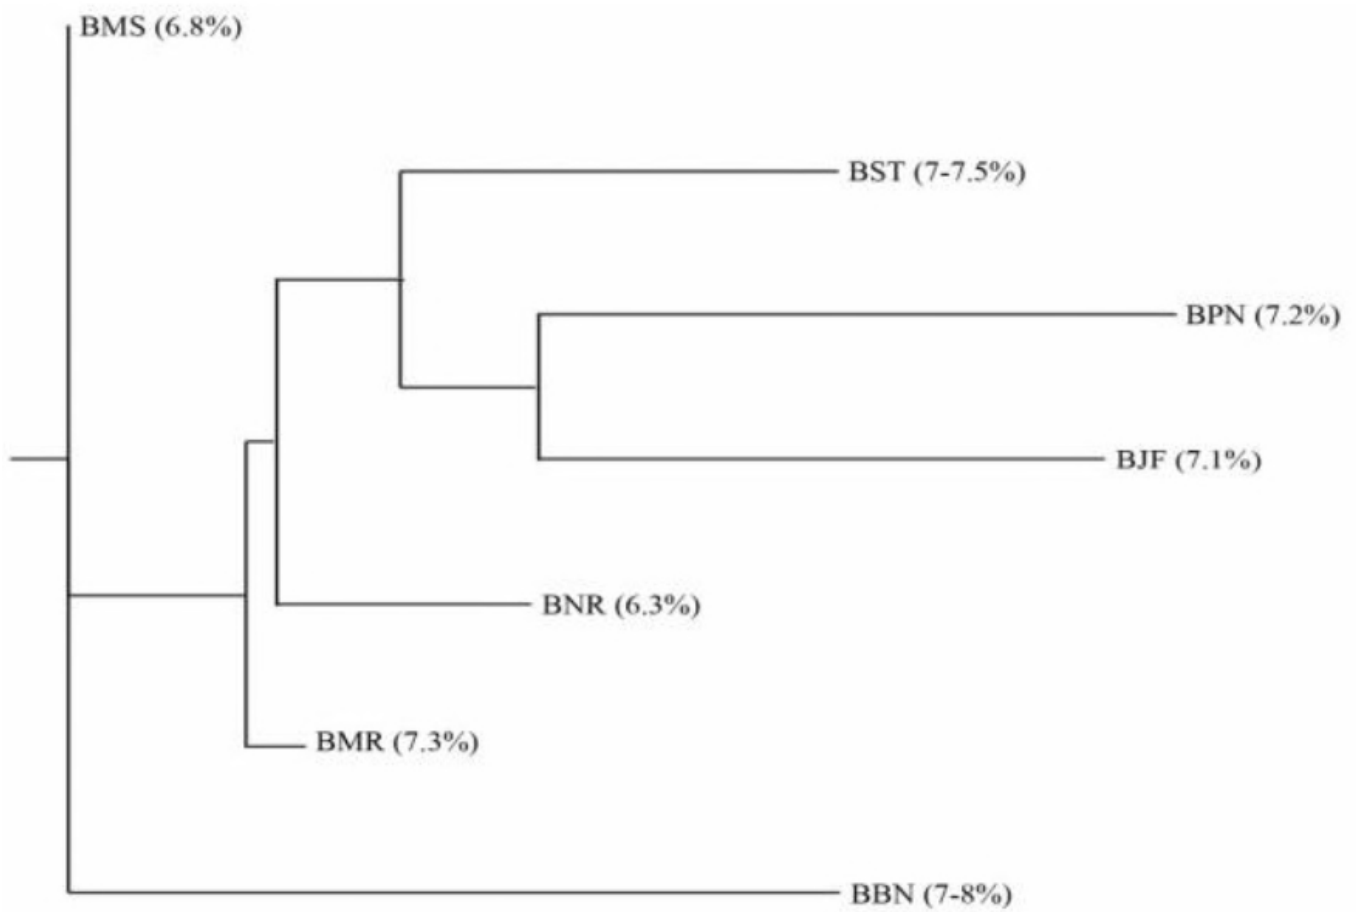**B**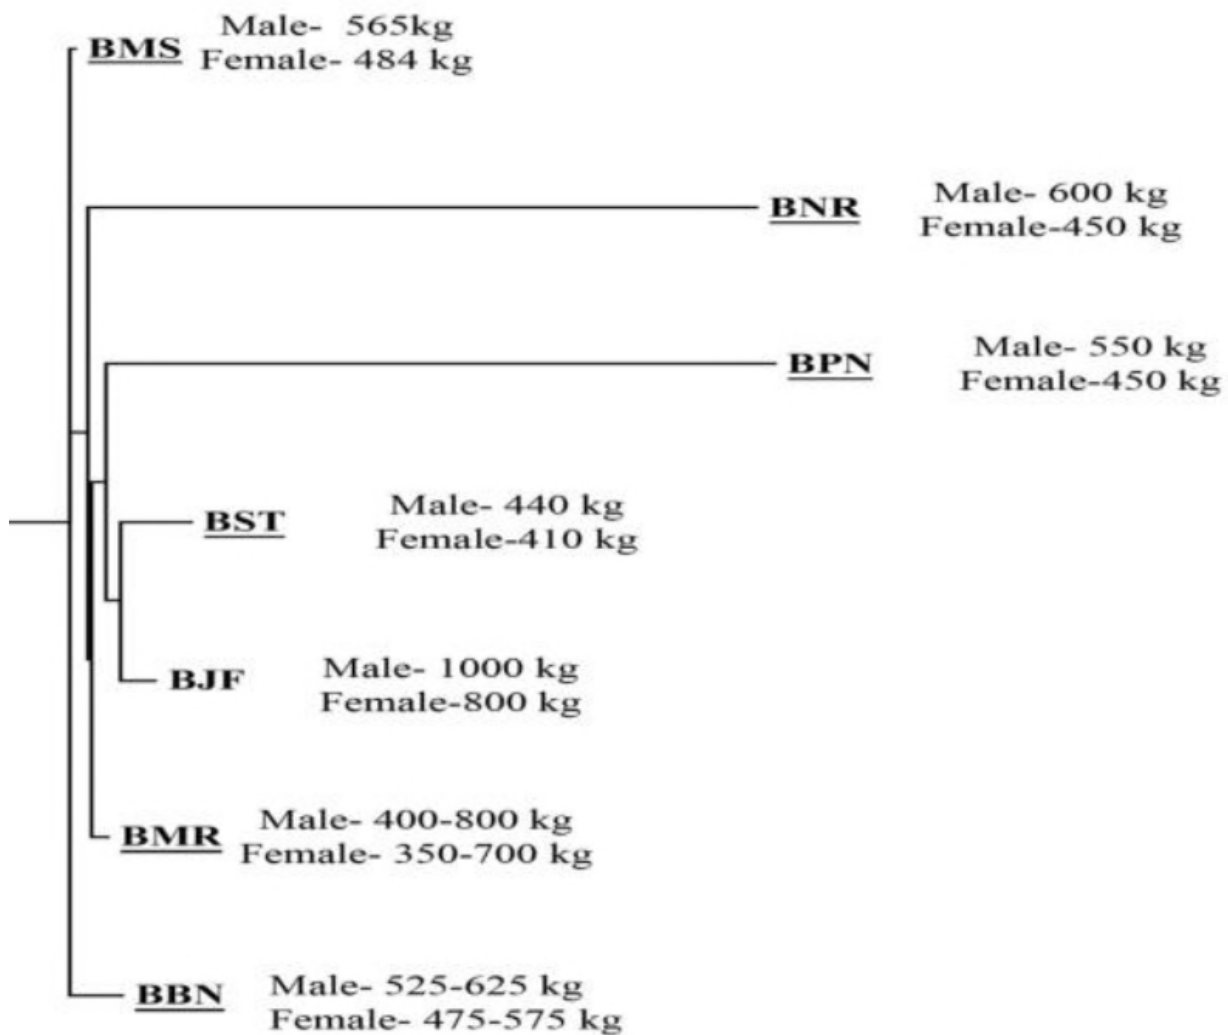

Source: https://www.biorxiv.org/content/10.1101/395681v1.full.pdf
